# Supplementary material
Source: PubMed Central journal article supplement (PMC5452800)
Supplement: AEM.00341-17_zam999117874s1.pdf [file AEM.00341-17_zam999117874s1.pdf]

## Supplemental Material (Born et al.)

**Table S1.** Host ranges of Y2 wildtype and the recombinant phages

| Genus                 | Species            | Strain      | Y2 | Y2:: <i>dpoL1-C</i> | Y2:: <i>luxAB</i> |
|-----------------------|--------------------|-------------|----|---------------------|-------------------|
| <i>Erwinia</i>        | <i>amylovora</i>   | CFBP 1430   | +  | +                   | +                 |
|                       |                    | Ea153       | +  | +                   | +                 |
|                       |                    | Ea7/74      | +  | +                   | +                 |
|                       |                    | Ea1/79      | +  | +                   | +                 |
|                       |                    | ACW 38899   | +  | +                   | +                 |
|                       |                    | ACW 56400   | +  | +                   | +                 |
|                       |                    | ACW 44274   | +  | +                   | +                 |
|                       |                    | ACW 42912   | +  | +                   | +                 |
|                       |                    | ACW 30560   | +  | +                   | +                 |
|                       |                    | Ea Rac 3075 | +  | +                   | +                 |
|                       |                    | ACW 55500   | +  | +                   | +                 |
|                       |                    | ACW 55835   | +  | +                   | +                 |
|                       |                    | ACW 55955   | +  | +                   | +                 |
|                       |                    | Ea 4/82     | +  | +                   | +                 |
|                       |                    | IPV 1077/7  | +  | +                   | +                 |
|                       |                    | IPV-BD 5357 | +  | +                   | +                 |
|                       |                    | 01SFR-BO    | +  | +                   | +                 |
|                       |                    | OMPBO 691.2 | +  | +                   | +                 |
|                       |                    | LA 469      | +  | +                   | +                 |
|                       |                    | LA 071      | +  | +                   | +                 |
| LA 411                | +                  | +           | +  |                     |                   |
| LA 468                | +                  | +           | +  |                     |                   |
| LA 477                | +                  | +           | +  |                     |                   |
| <i>Erwinia</i>        | <i>persicina</i>   | ACW 40943   | -  | -                   | -                 |
|                       |                    | ACW 40560x  | -  | -                   | -                 |
|                       |                    | ACW 41072   | -  | -                   | -                 |
| <i>Erwinia</i>        | <i>billingiae</i>  | B90         | -  | -                   | -                 |
|                       |                    | LMG 62613   | -  | -                   | -                 |
| <i>Pantoea</i>        | <i>agglomerans</i> | Eh 42       | -  | -                   | -                 |
|                       |                    | Em 406      | -  | -                   | -                 |
|                       |                    | Em 283      | -  | -                   | -                 |
| <i>Pantoea</i>        | <i>vagans</i>      | C9-1        | -  | -                   | -                 |
| <i>Pantoea</i>        | <i>ananatis</i>    | 351 Lys     | -  | -                   | -                 |
| <i>Pectobacterium</i> | <i>carotovorum</i> | EC 852      | -  | -                   | -                 |
| <i>Escherichia</i>    | <i>coli</i>        | DSM 498     | -  | -                   | -                 |
|                       |                    | DSM 613     | -  | -                   | -                 |
| <i>Pseudomonas</i>    | <i>aeruginosa</i>  | PAO1        | -  | -                   | -                 |
|                       |                    | PA14        | -  | -                   | -                 |
| <i>Pseudomonas</i>    | <i>fluorescens</i> | DSM 50090   | -  | -                   | -                 |
| <i>Salmonella</i>     | <i>enterica</i>    | ATCC 14028  | -  | -                   | -                 |
|                       |                    | DT 7155     | -  | -                   | -                 |
